# Supplementary material
Source: Research Square preprint supplement (doi:10.21203/rs.3.rs-9219043/v1)
Supplement: Supplementary file 1 [file 08be606d90794c37e0e9afeb.docx]

A Q-sample consisting of 40 statements

| **No.** | **Q-Statement** |
| --- | --- |
| 1 | I firmly believe that as long as I have enough willpower, I can overcome all the difficulties of PCOS. |
| 2 | I think PCOS is mainly a fertility issue, so if I don’t want to have children right now, I don’t need to manage it strictly. |
| 3 | I believe there is some kind of “perfect solution” (like a specific diet or medication) that I just haven’t found yet. |
| 4 | I believe “every medicine has its side effects” and I am very resistant to long-term use of medications like metformin. |
| 5 | I know that losing 5–10% of my weight would bring great benefits, but this goal still feels out of reach to me. |
| 6 | I believe that “keto/fasting” is the only way to address obesity in PCOS, and that other methods are too slow. |
| 7 | I feel that I was born with an “easy-to-gain-weight” constitution, so no matter how hard I try, it’s a losing battle. |
| 8 | I believe that staying up late doesn’t directly affect my PCOS. |
| 9 | I feel desperate and weighed down by the need to manage PCOS for life, as if I’ve been given a life sentence. |
| 10 | I feel deeply frustrated by weight fluctuations or recurring symptoms, believing I will never succeed. |
| 11 | I feel confused by all the conflicting health information and don’t know whom to trust. |
| 12 | The constant effort of managing PCOS exhausts me physically and mentally, and I long to live a “normal” life. |
| 13 | I feel self-conscious about my body shape, acne, or excessive hair, and I avoid social and athletic situations. |
| 14 | I feel immense sadness and stress because PCOS may lead to infertility. |
| 15 | Every time I start a new plan, I’m full of enthusiasm, but after a few weeks, my motivation fades. |
| 16 | I need professional psychological support to cope with the emotional issues caused by PCOS, not just lifestyle guidance. |
| 17 | I can regularly engage in at least 150 minutes of moderate-intensity exercise per week (e.g., brisk walking, swimming). |
| 18 | On weekdays, I can prepare and follow a healthy low-GI diet plan. |
| 19 | I can effectively decline high-sugar snacks like milk tea or cake shared by colleagues or friends. |
| 20 | In social settings such as gatherings with friends or family dinners, I find it hard to stick to my healthy eating principles. |
| 21 | I can fall asleep before 11 p.m. and get 7–8 hours of quality sleep. |
| 22 | When work gets busy or when traveling, my exercise and diet plans are the first things I give up. |
| 23 | I can consciously avoid prolonged sitting, for example, by getting up and moving around every hour of sitting. |
| 24 | I prefer trying short-term extreme weight loss methods over accepting slow, gradual lifestyle changes. |
| 25 | My family’s eating habits are unhealthy, making it hard for me to stick to a healthy diet on my own. |
| 26 | My work and study pace is too fast, leaving me with no time or energy to exercise or cook. |
| 27 | Takeout and convenience stores are my main food sources, and healthy options are limited and expensive. |
| 28 | The lack of accessible, affordable exercise venues or classes is a major barrier to my physical activity. |
| 29 | My friends and social circles often gather around meals and drinking, making it hard for me to fit in. |
| 30 | My doctor or nurse does not provide ongoing follow-up or supervision, leaving me feeling like I’m fighting alone. |
| 31 | The success stories I see online feel unrealistically “perfect,” which actually adds to my pressure. |
| 32 | Although my family cares about me, their reminders and pressure (e.g., “How can you eat that again?”) make me want to rebel. |
| 33 | I believe the key to managing PCOS is to first use medication to regulate hormones and metabolism. |
| 34 | For me, having a regular exercise buddy or group is the most effective way to stay consistent. |
| 35 | I prefer using online mini-programs or WeChat groups to receive regular guidance and supervision from a nurse. |
| 36 | Attending hospital-based PCOS patient education programs or support groups is very appealing to me. |
| 37 | I believe that as long as I lose weight quickly, all my PCOS symptoms will naturally disappear. |
| 38 | I need to learn how to prepare quick, healthy meals on a busy schedule and a limited budget. |
| 39 | I believe that improving my health and preventing long-term complications is my biggest motivation to persevere. |
| 40 | I’ve tried “keto diet / 16:8 intermittent fasting” and saw short-term results, but I can’t stick with it long-term, and I don’t know how to transition safely. |
