# Supplementary material
Source: Research Square preprint supplement (doi:10.21203/rs.3.rs-9219043/v1)
Supplement: Supplementary file 2 [file ae445d8663a4681e387dbf82.doc]

## ****nterview Guide:** barriers to healthy lifestyle implementation in women with PCOS**

### I. Self-Introduction and Purpose

"Hello, thank you for participating in our study. I am Liu Minli from the Department of Gynecology. Our team is conducting a research study on barriers to healthy lifestyle implementation in women with PCOS. The purpose is to deeply understand your genuine thoughts and feelings about maintaining a healthy lifestyle, such as dietary control and exercise. Your insights are very important to us."

**Confidentiality and Ethics Statement:**

"This interview will be kept strictly confidential and used for scientific research only. The interview will take approximately 30-45 minutes. You may choose not to answer any question and may withdraw at any time. I will record the conversation to ensure accurate documentation. If you do not agree, we can take notes instead."

### II. Core Interview Questions

**Opening Statement:** "Now I would like to talk with you about your experiences and feelings when trying to live a healthy life. There are no right or wrong answers—please share whatever comes to mind."

1. How do you understand PCOS? Do you think it is closely related to lifestyle factors such as diet and exercise?
2. What do you think of the health advice given by doctors or others? Do you find it important? Why?
3. From your perspective, what are the benefits of maintaining a healthy lifestyle? What difficulties or barriers might you encounter?
4. What emotional experiences have you had during weight management? (e.g., anxiety, frustration, hope, pride?) Could you elaborate?
5. How do PCOS symptoms (such as obesity, hirsutism, acne) affect your mood and daily life (e.g., social activities, exercise motivation)?
6. Do you feel stressed or inferior because of your body shape or symptoms? How does this feeling affect your determination to adopt healthy behaviors?
7. How does your physical condition (such as frequent fatigue, hunger, premenstrual mood swings) affect your adherence to healthy eating or exercise?
8. Have you ever given up on your plans due to physical discomfort caused by PCOS (e.g., hunger due to insulin resistance, fatigue)?
9. What is the attitude of your family, partner, friends, or colleagues toward your health management? Are they supportive, neutral, or opposing? How do they show this?
10. Does your environment (such as family dietary habits, work nature, social engagements, economic conditions) make health management easier or more difficult for you?
11. Do you obtain information from social media (such as Xiaohongshu, Douyin)? How has this information affected you?
12. Looking back at your past attempts to make changes, what do you think were the main reasons for success or failure?
13. Regarding "eating," what is the biggest difficulty you face? (e.g., not knowing what to eat, not knowing how to cook, preference for strong flavors, inability to resist food temptations?)
14. Regarding "exercise," what is the biggest difficulty you face? (e.g., no time, no venue, not knowing which exercise is effective, feeling more tired after exercise, finding it boring?)
15. Do you need any tools or skills to help you? (e.g., how to make plans, how to keep records, how to cope with unexpected situations, how to self-motivate?)

### III. Interview Conclusion and Acknowledgments

**Summary and Confirmation:** "Thank you for sharing so many valuable experiences. To confirm my understanding, I will briefly summarize the key points you mentioned. Is my understanding correct? Is there anything else you would like to add?"

**Final Thanks:** "Thank you again sincerely for your time and candid sharing! This is crucial for our research."
